# Supplementary material for: Cloning, expression and characterization of a novel fructosyltransferase from Aspergillus niger and its application in the synthesis of fructooligosaccharides
Source: Royal Society of Chemistry journal article supplement (doi:10.1039/c9ra02520k), 2019-01-01
Supplement: c9ra02520k1.pdf [file c9ra02520k1.pdf]

# 1 Supporting Information for the article

2

3 Fig.S1 Map of the recombinant plasmid pPIC9K-FT-A.

4 Fig. S2 The cDNA sequence (without its signal peptide) of FT-A from *Aspergillus niger* TCCC41686:

5 Fig. S3 Sequence alignment of fructosyltransferases from *A. niger*. Conserved domains are shown in

6 gray boxes and active site residues are underlined. Altered residues are shown in lowercase letters. The

7 picture only shows a part of the amino acid sequences.

8 Fig. S4 SDS-PAGE analysis of purified FT-A. M: protein molecular weight marker; the FT-A fragment

9 is indicated by the arrow.

10 Fig. S5 The HPLC chromatograms of FOS. A: The HPLC chromatograms of FOS (Mixed standard

11 sample, 0.75  $\mu\text{g mL}^{-1}$ ). B: The HPLC chromatograms of FOS formation at 70 min of synthesis based

12 on sucrose as substrate (F: fructose, G: glucose, GF: sucrose, GF<sub>2</sub>: 1-ketose, GF<sub>3</sub>: nistose).

13

14

15

16

17

18

19

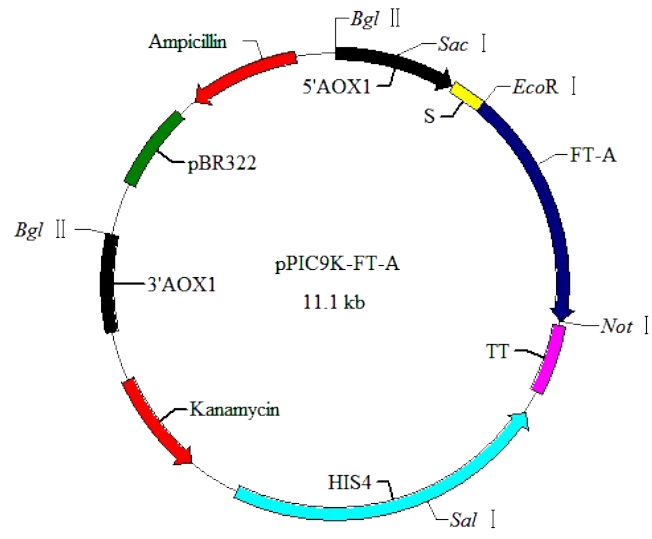

20

21

Fig. S1

5' -GCCTCGCCTTCCATGCAGACGCGGGCCTCCGTGGTCATCGACTACAATGTCGCTCCTCCAAACCTC  
TCCACCCTGCCCAATGGCTCCCTCTTCGAAACATGGCGGCCCCGCGCCCACGTCTTGCCCCAAACGGC  
CAGATCGGTGATCCCTGCCTGCATTACACCGATCCCGCCACGGGCCTCTTCCACGTGGCTTCCTTCAC  
GATGGCAGCGGCATCTCCAGTGCCACCACCGATGACCTAGCCACCTACCAAGACCTCAACCAAGGCAAC  
CAAGTCATTGTCCCTGGGGGCATCAACGACCCCGTCGCTGTCTTCGACGGCTCCGTTCATCCCCAACGGC  
ATCAACGGCCTCCCCACCCTCCTCTACACCTCCGTCTCCTACCTCCCCATCCACTGGTCGATCCCCTAC  
ACCCGCGGCAGTAAGACTCAATCCCTCGCCGTCTCCTCCGACGGCGGCAGCAACTTCACCAAGCTCGAC  
CAGGGCCCCGTTCATCCCTGGCCCTCCCTTCGCTACAACGTCACCGCATTCCGGGACCCCTACGTCTTC  
CAAAACCCCACTCTTGACTCCCTCCTCCACAGCAAGAACAACACCTGGTACACCGTCATCTCCGGTGGT  
CTGCACGAAAAGGGCCCCGCTCAATTCCCTCTACCGCCAGTACGACTCGGACTTTCAGTACTGGGAGTAC  
CTCGGCCAATGGTGGCACGAACCCACCAACTCCACCTGGGGTAACGGCACCTGGGCCGCGCGCTGGGCC  
TTCAACTTTGAGACCGGCAACGTCTTCAGTCTCGACGAGTACGGATACAACCCCCACGGCCAGATCTTC  
ACCACCATCGGCACTGAGGGCTCTGACCTGCCCCGTGCTGCCCCAGCTCACCAGCATCCACGACATGCTC  
TGGGTGTCCGGTACAGTCTCTCGCAATGGCTCTGTCTCGTTCAACCCCAACATGGCGGGCTTCCTCGAC  
TGGGGCTTCTCCTCTTACGCTGCTGCCGAAAGGTTCTCCCCTCGACTTCTCTGCCTTCCACGAAGAGC  
GGCGCCCCGGATCGCTTCATCTCCTACGTCTGGCTGTCCGGTGACCTGTTTGAACAGGCCGAAGGGTTC  
CCCACGAACCAGCAGAATTGGACCGGTACGCTGCTGCTTCCGCGTGAGTTGCGCGTGCTGTATATCCCC  
AATGTGGTGGACAATGCTCTGGCCCCGGAGTCTGGTGCCTCGTGGCAGGTCGTGAGCAGCGATGGCAGT  
GCGGGCACCGTCGAGCTGCAGACGCTGGGTATCTCCATTGCCCGGGAGACCAAGGCCGCGCTGCTGTGCG  
GGAACGTCGTTCACTGAGTCCGGCCGCACCCTGAACAGCAGTGGTGTGTTCCGTTCAAGCGCTCGCCA  
TCCGAGAAGTTCTTCGTTCTGTCCGCACAGCTGTCCTTCCCTGCTTCGGCTAGGGGATCGGGACTTAAG  
AGTGGGTTCCAGATCCTCTCATCGGAGCACGAGAGTACCACTGTGTACTACCAGTTCTCGAATGAGTCG  
ATTATCGTGGATCGTAGCAACACTAGTGCTGCGGCGCGCACGACTGATGGTATCGATAGCAGTGGCGAA  
GCTGGCAAGTTGCGTCTGTTTGACGTGCTGAATGGCGGCAGCAGGCCATTGAGACGCTAGATTTGACT  
CTCGTGGTGGATAACTCCGTGTTGGAGGTGTATGCCAATGGTCCGTTTTCGTTGAGTACCTGGGTTCGT  
TCCTGGTACGCCAACTCCACTAACATCAGCTTCTTCCATAATGGCGTGGGTGGTGTGCGTTCTCCAAA  
GTGACTGTGTCCGAGGGCTTGTATGATGCTTGGCCGGATCGTCAGTCTCATCACCACCATCACCCTAA

-3'

22

23

Fig. S2

|                    |                                          |     |
|--------------------|------------------------------------------|-----|
| FTase (FT-A) .seq  | MKLQTASVLLGSAAAASPSMQTRASVVIDYNVAPPNLSTL | 40  |
| FTase (FruSG) .seq | -----p-----                              | 40  |
| FTase (fwt) .seq   | -----                                    | 40  |
| FTase (fts1) .seq  | -----                                    | 40  |
| <b>Domain A</b>    |                                          |     |
| FTase (FT-A) .seq  | PNGSLFETWRPRAHVLPPNGQIGDPCLHYTDPATGLFHVG | 80  |
| FTase (FruSG) .seq | -----s-----s-----                        | 80  |
| FTase (fwt) .seq   | -----s-----                              | 80  |
| FTase (fts1) .seq  | -----                                    | 80  |
| FTase (FT-A) .seq  | FLHDGSGISSATDDLATYQDLNQGNGQVIVPGGINDPVAV | 120 |
| FTase (FruSG) .seq | -----k-----                              | 120 |
| FTase (fwt) .seq   | -----k-----                              | 120 |
| FTase (fts1) .seq  | -----                                    | 120 |
| FTase (FT-A) .seq  | FDGSVIPNGINGLPTLLYTSVSYLPIHWSIPYTRGSKTQS | 160 |
| FTase (FruSG) .seq | -----s-----f-----e---                    | 160 |
| FTase (fwt) .seq   | -----s-----f-----e---                    | 160 |
| FTase (fts1) .seq  | -----f-----e---                          | 160 |
| <b>Domain D</b>    |                                          |     |
| FTase (FT-A) .seq  | LAVSSDGGSNFTKLDQGPVIPGPPFAYNVTAFRDPYVFQN | 200 |
| FTase (FruSG) .seq | -----                                    | 200 |
| FTase (fwt) .seq   | -----                                    | 200 |
| FTase (fts1) .seq  | -----                                    | 200 |
| FTase (FT-A) .seq  | PTLDSLLHSKNNTWYTVISGGLHEKGPAQFLYRQYDSDFQ | 240 |
| FTase (FruSG) .seq | -----g-----p---                          | 240 |
| FTase (fwt) .seq   | -----g-----p---                          | 240 |
| FTase (fts1) .seq  | -----                                    | 240 |
| <b>Domain E</b>    |                                          |     |
| FTase (FT-A) .seq  | YWEYLGQWWHEPTNSTWGNGTWAGRWAFNFETGNVFLDE  | 280 |
| FTase (FruSG) .seq | ---f-----                                | 280 |
| FTase (fwt) .seq   | ---f-----                                | 280 |
| FTase (fts1) .seq  | -----                                    | 280 |

24

25

Fig. S3

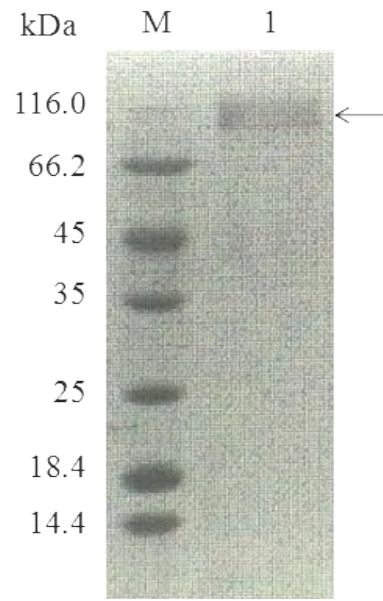

Fig. S4

26

27

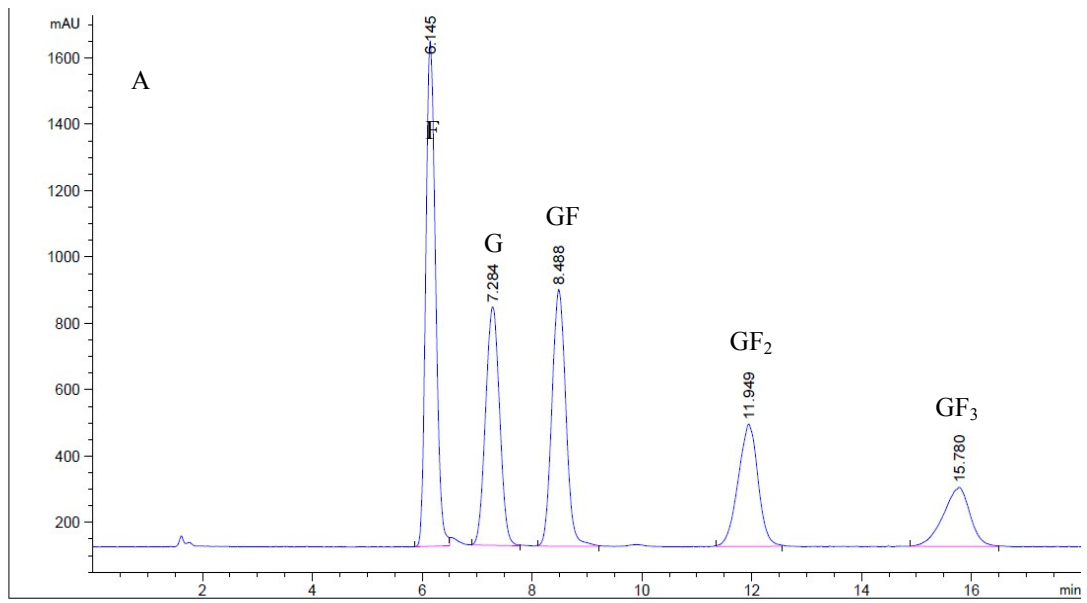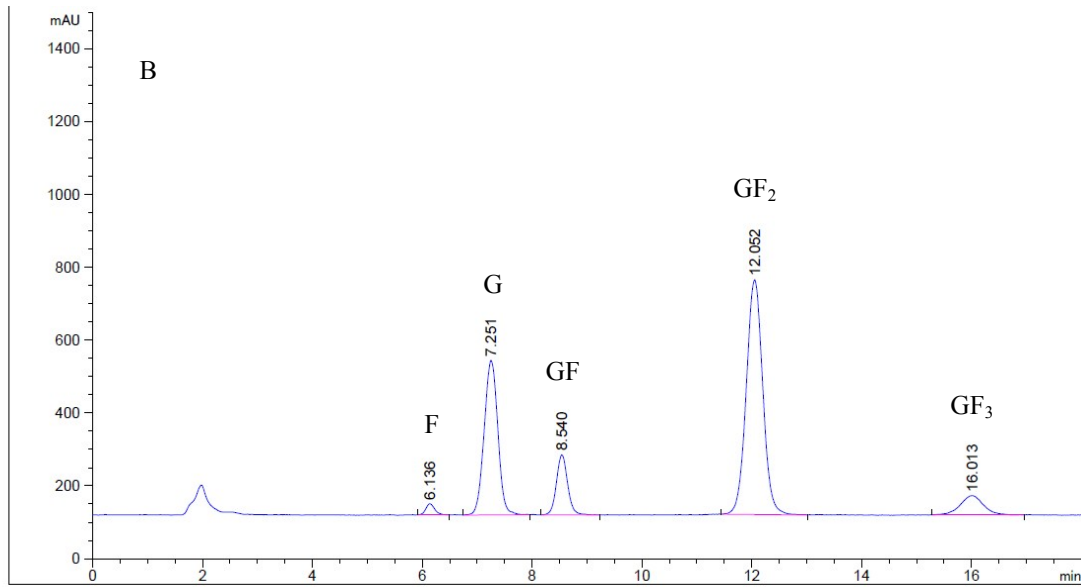

28

29

Fig. S5
